# Supplementary material for: Seismic detection of folded, subducted lithosphere at the core–mantle boundary
Source: Springer Nature journal article supplement (doi:10.1038/nature04757), 2006-05-01

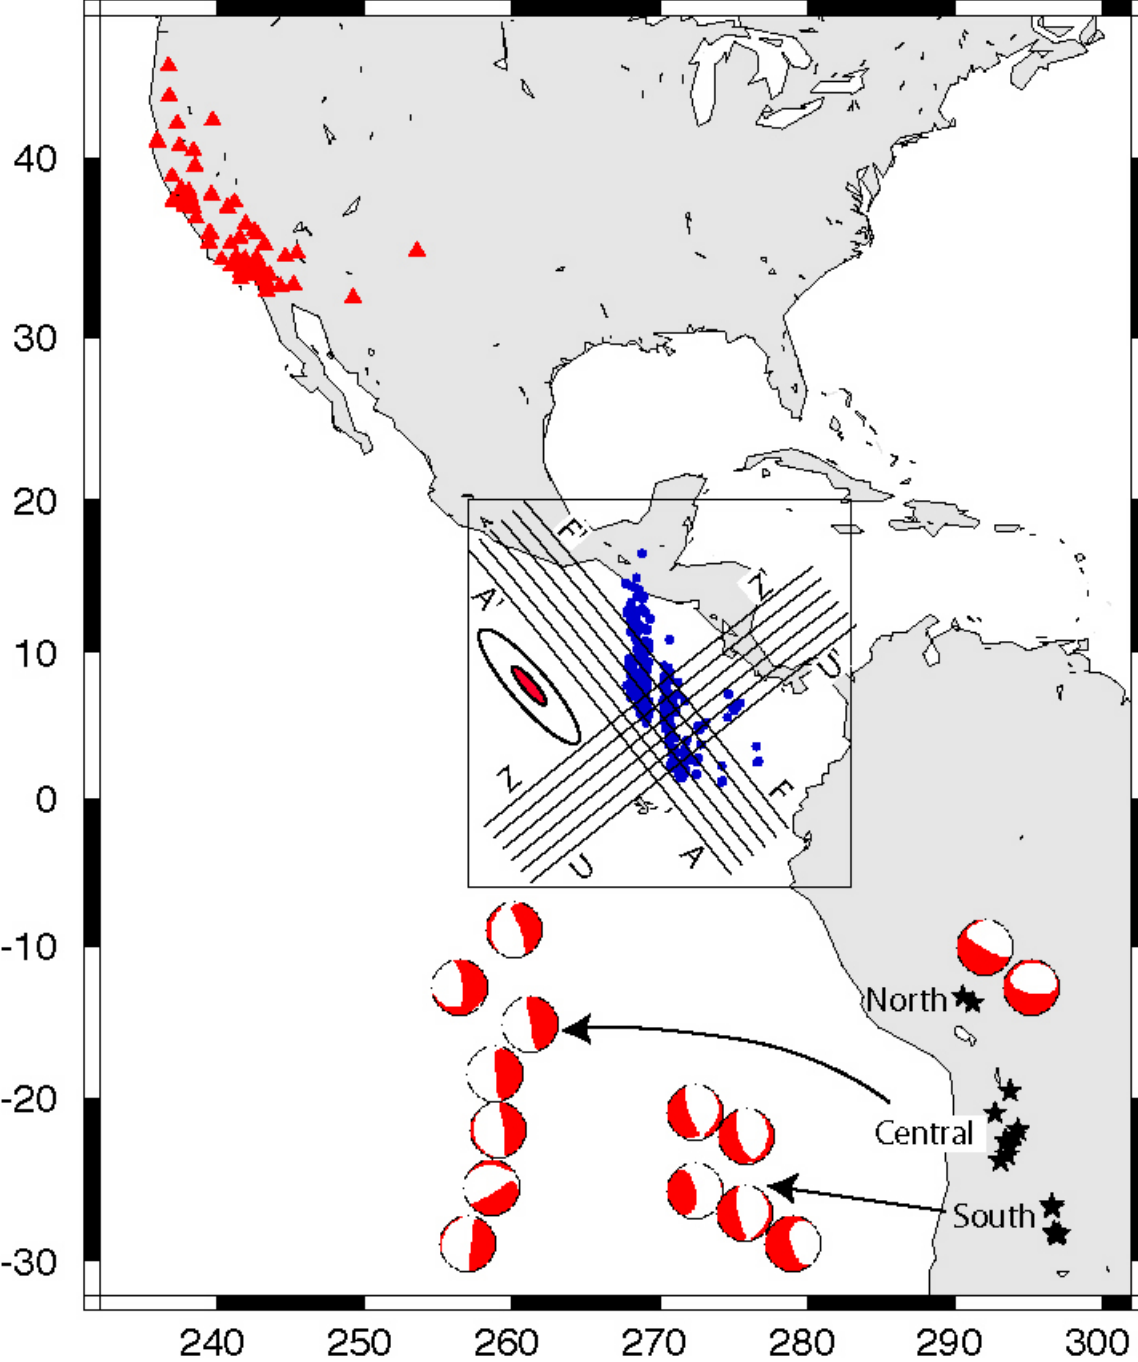

Supplementary Figure 1 [Hutko et al., 2006]

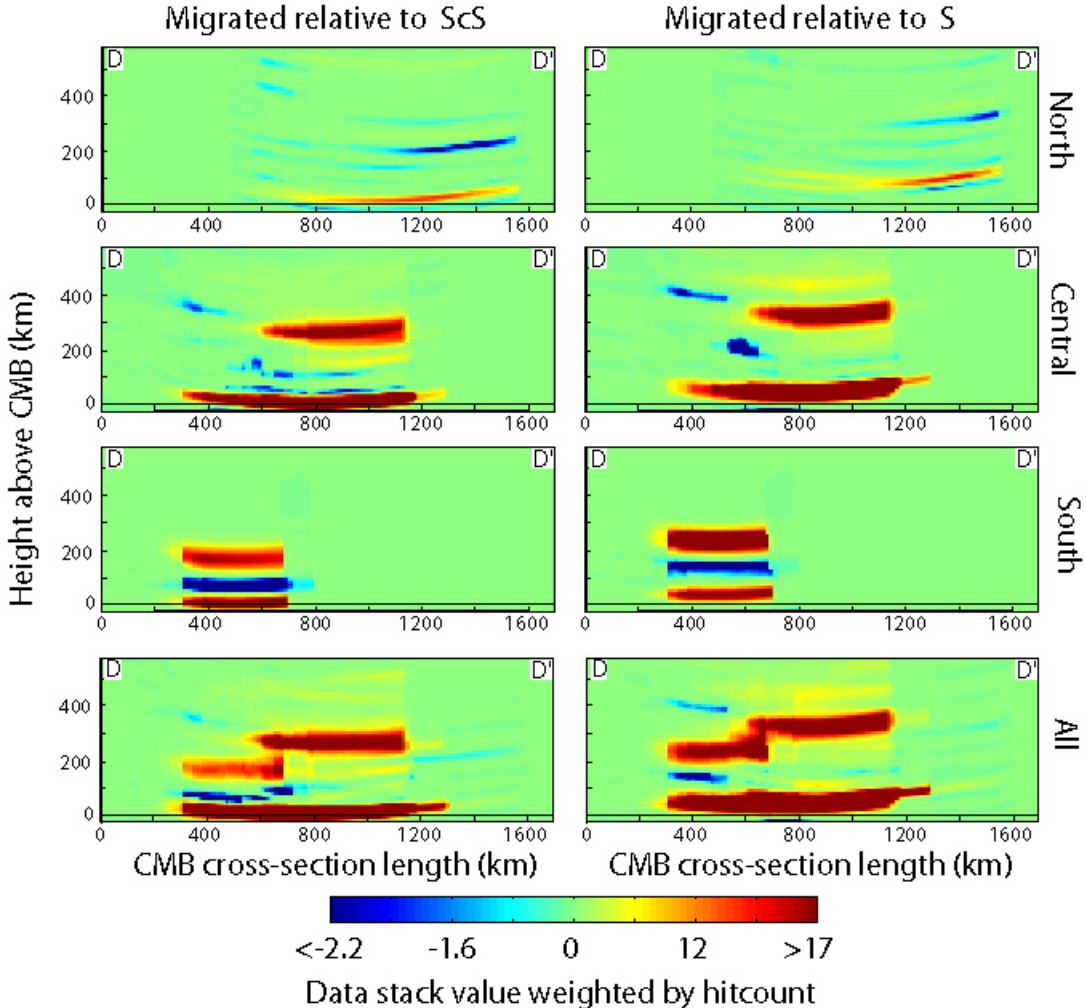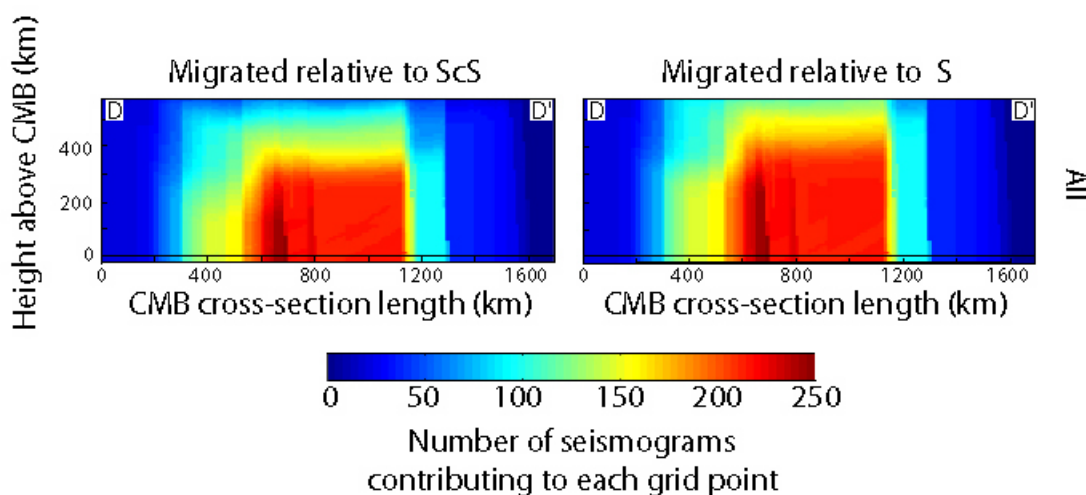



Migrated relative to ScS

Migrated relative to S

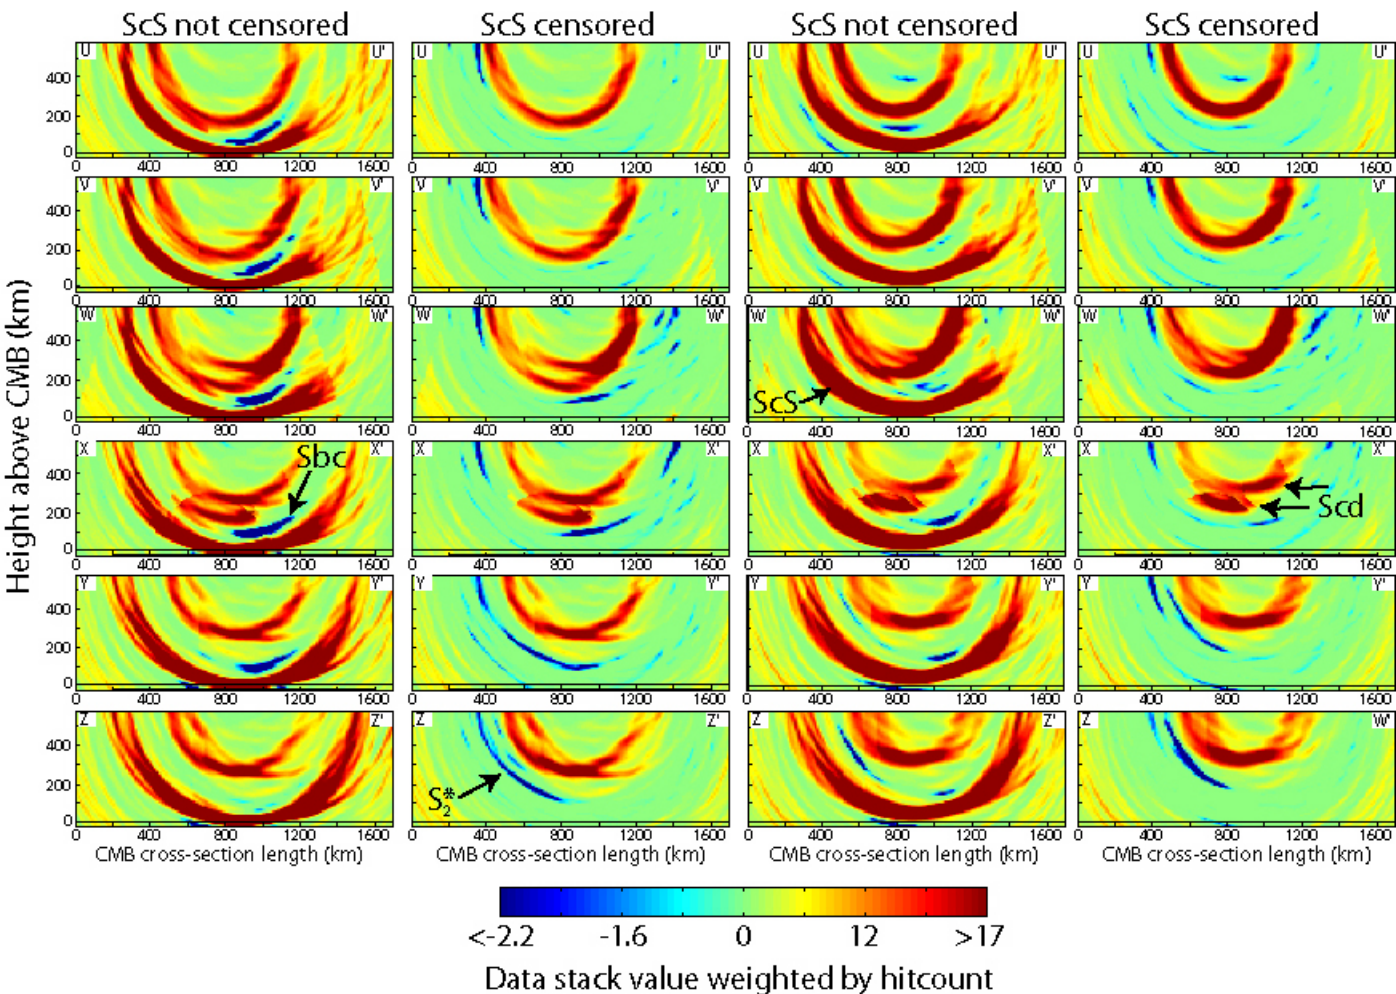

Migrated relative to ScS with ScS not censored

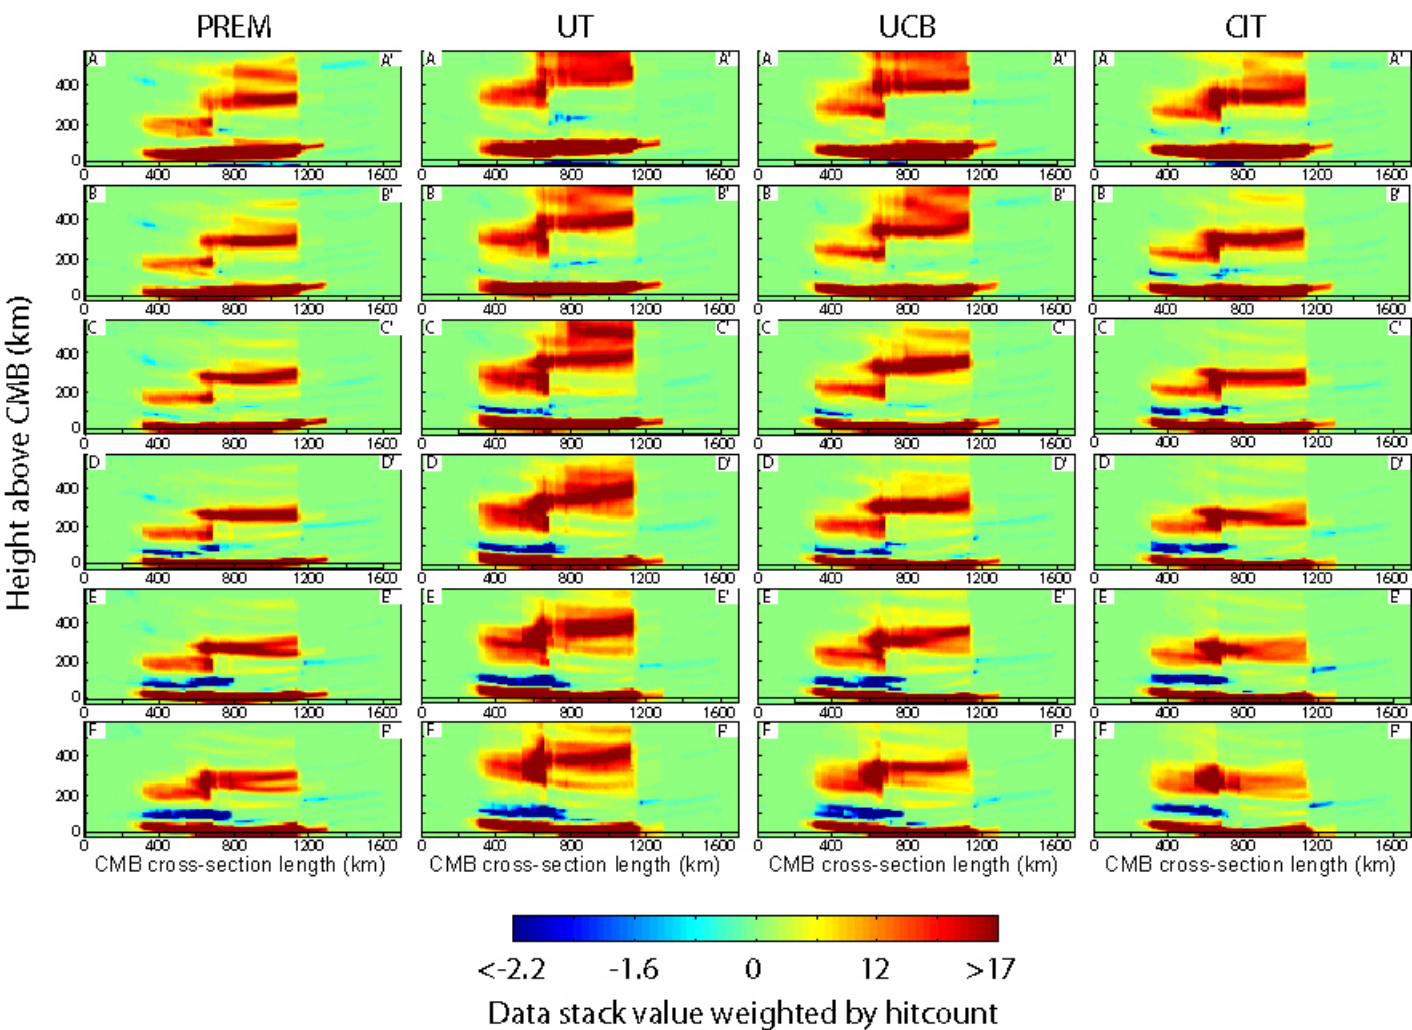

Supplementary Figure 4a [Hutko et al., 2006]

Migrated relative to ScS with ScS censored

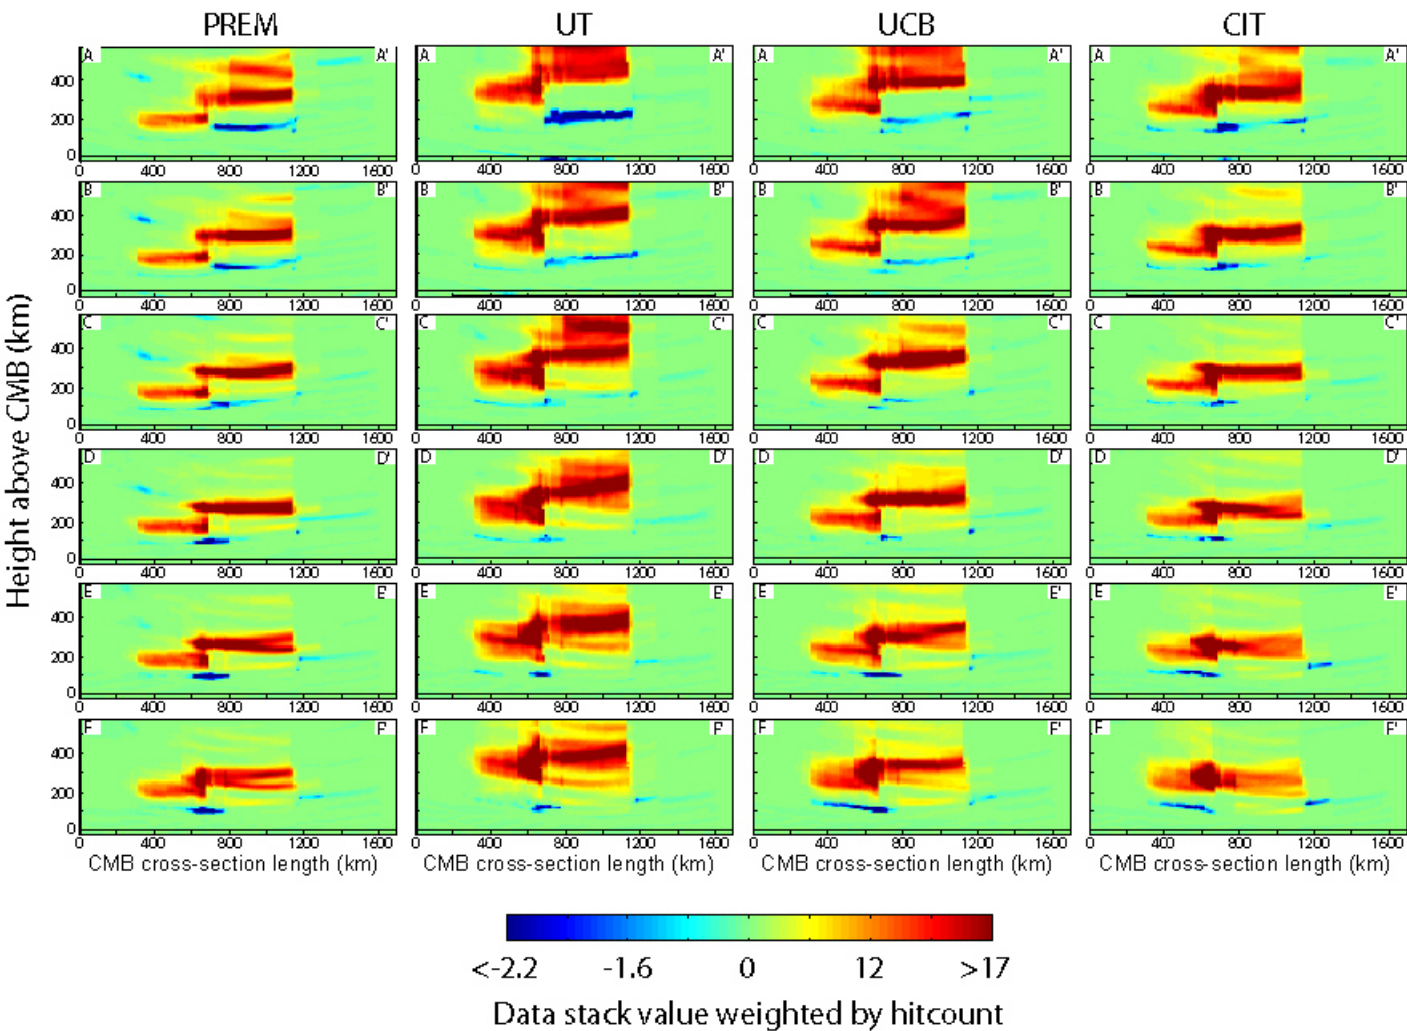

Migrated relative to S with ScS not censored

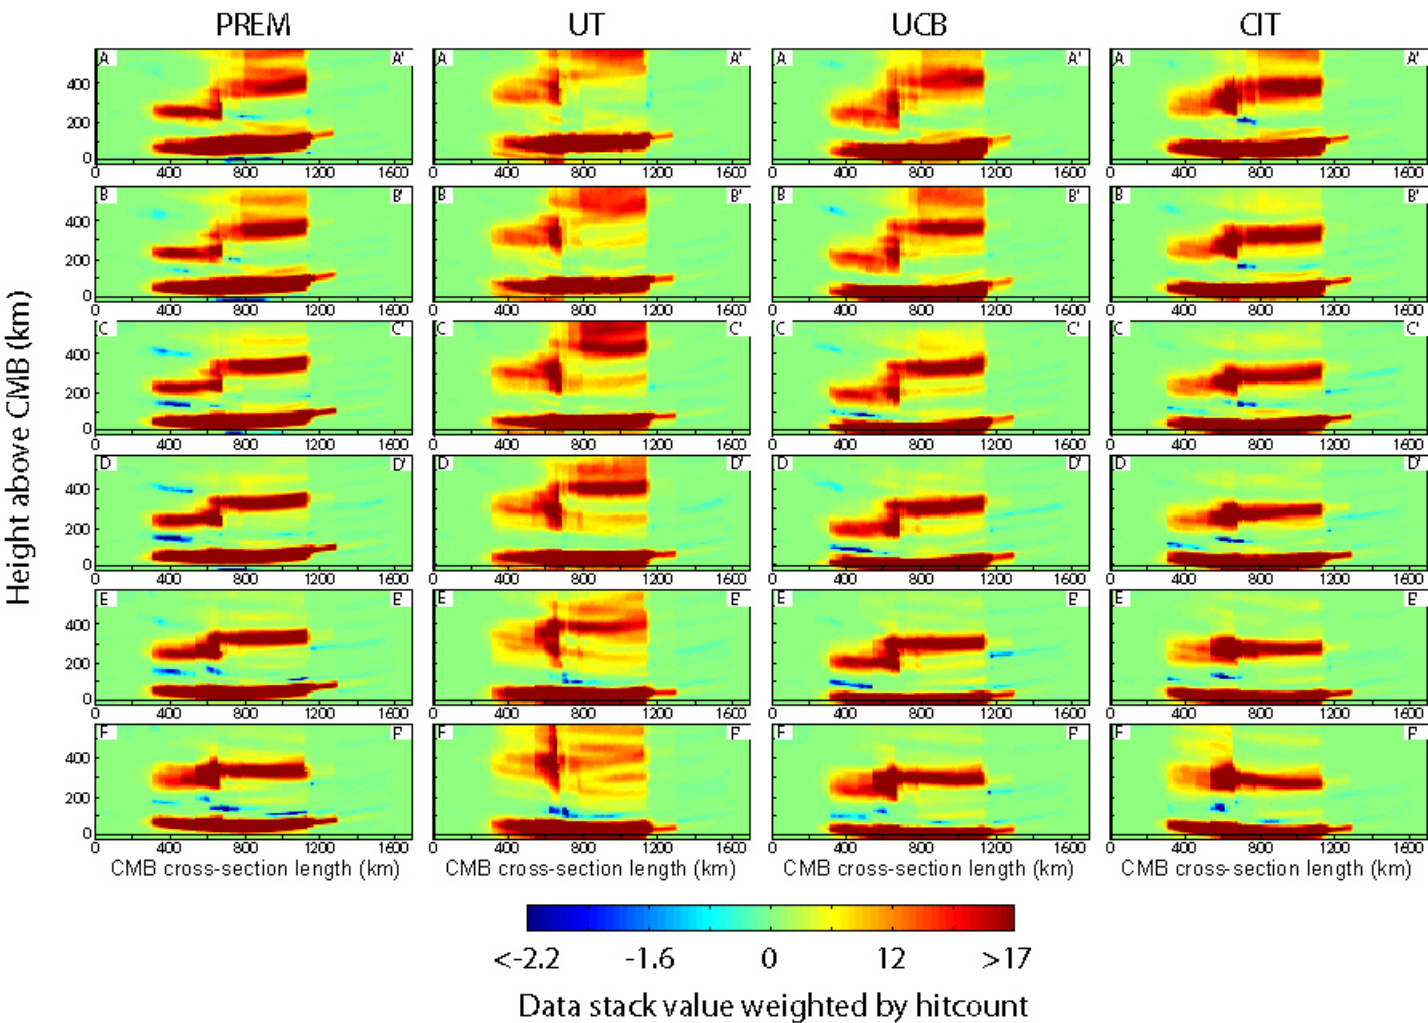

Migrated relative to S with SCS censored

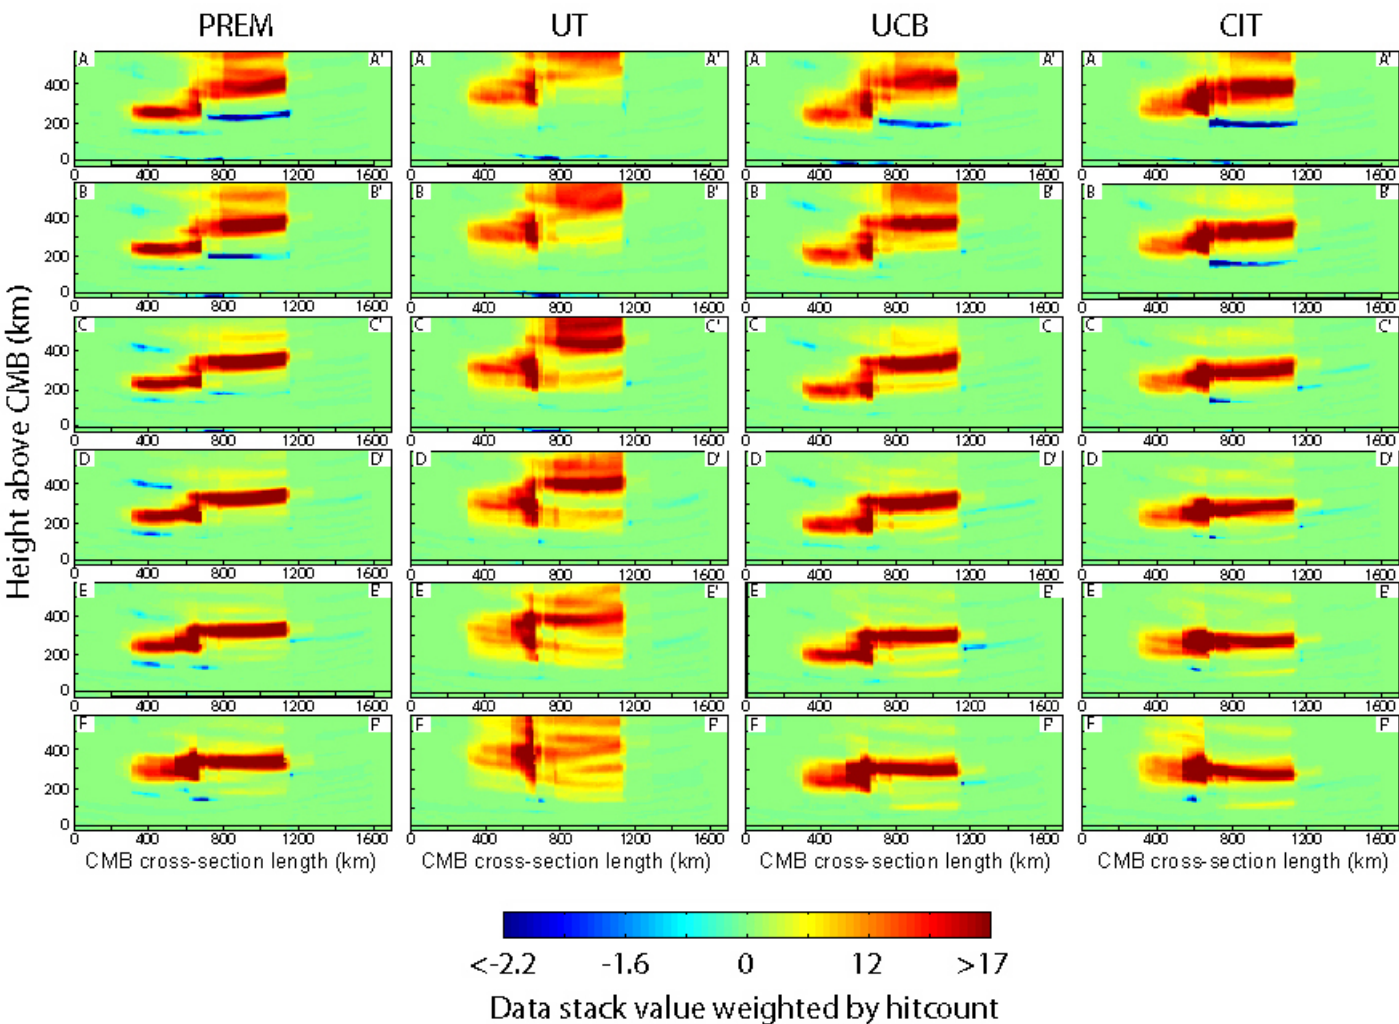



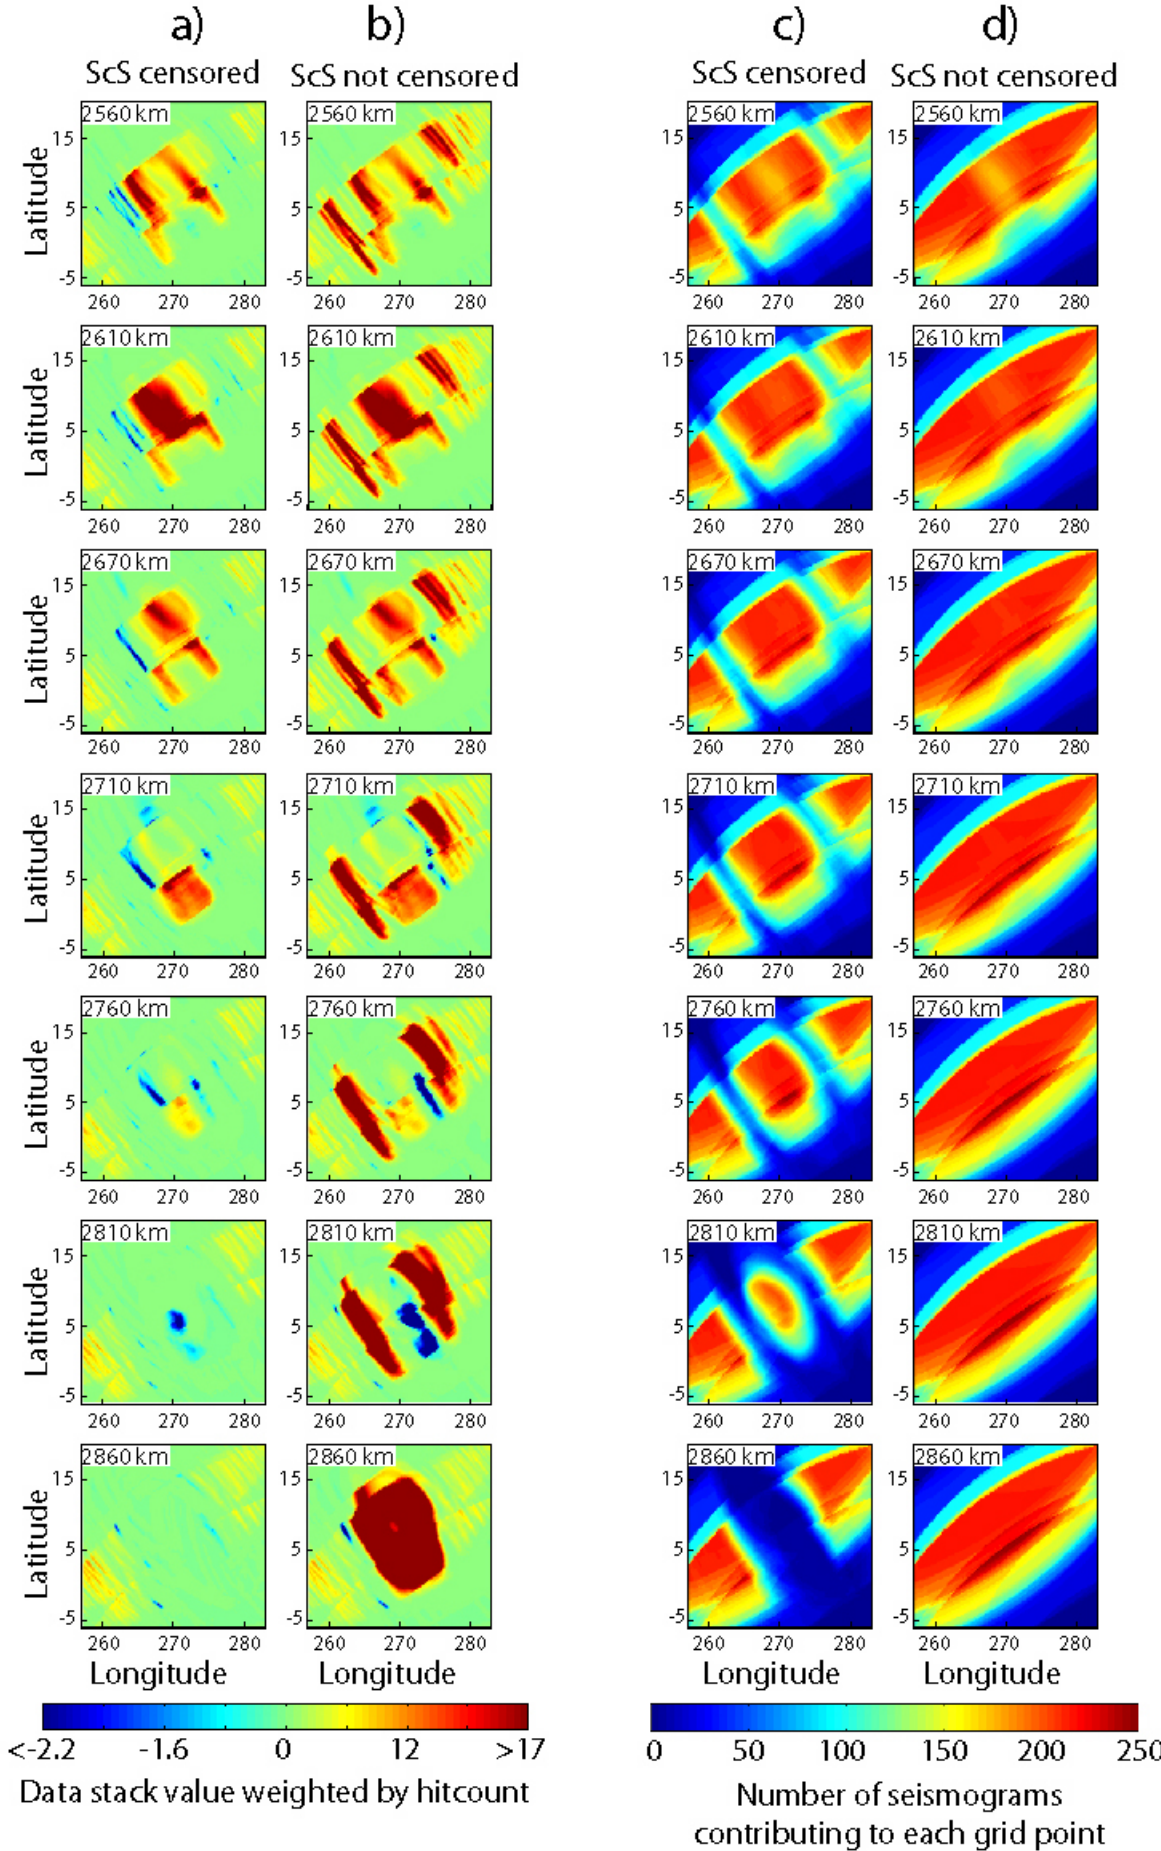

Supplementary Figure 5 [Hutko et al., 2006]

Migration of point scatterers

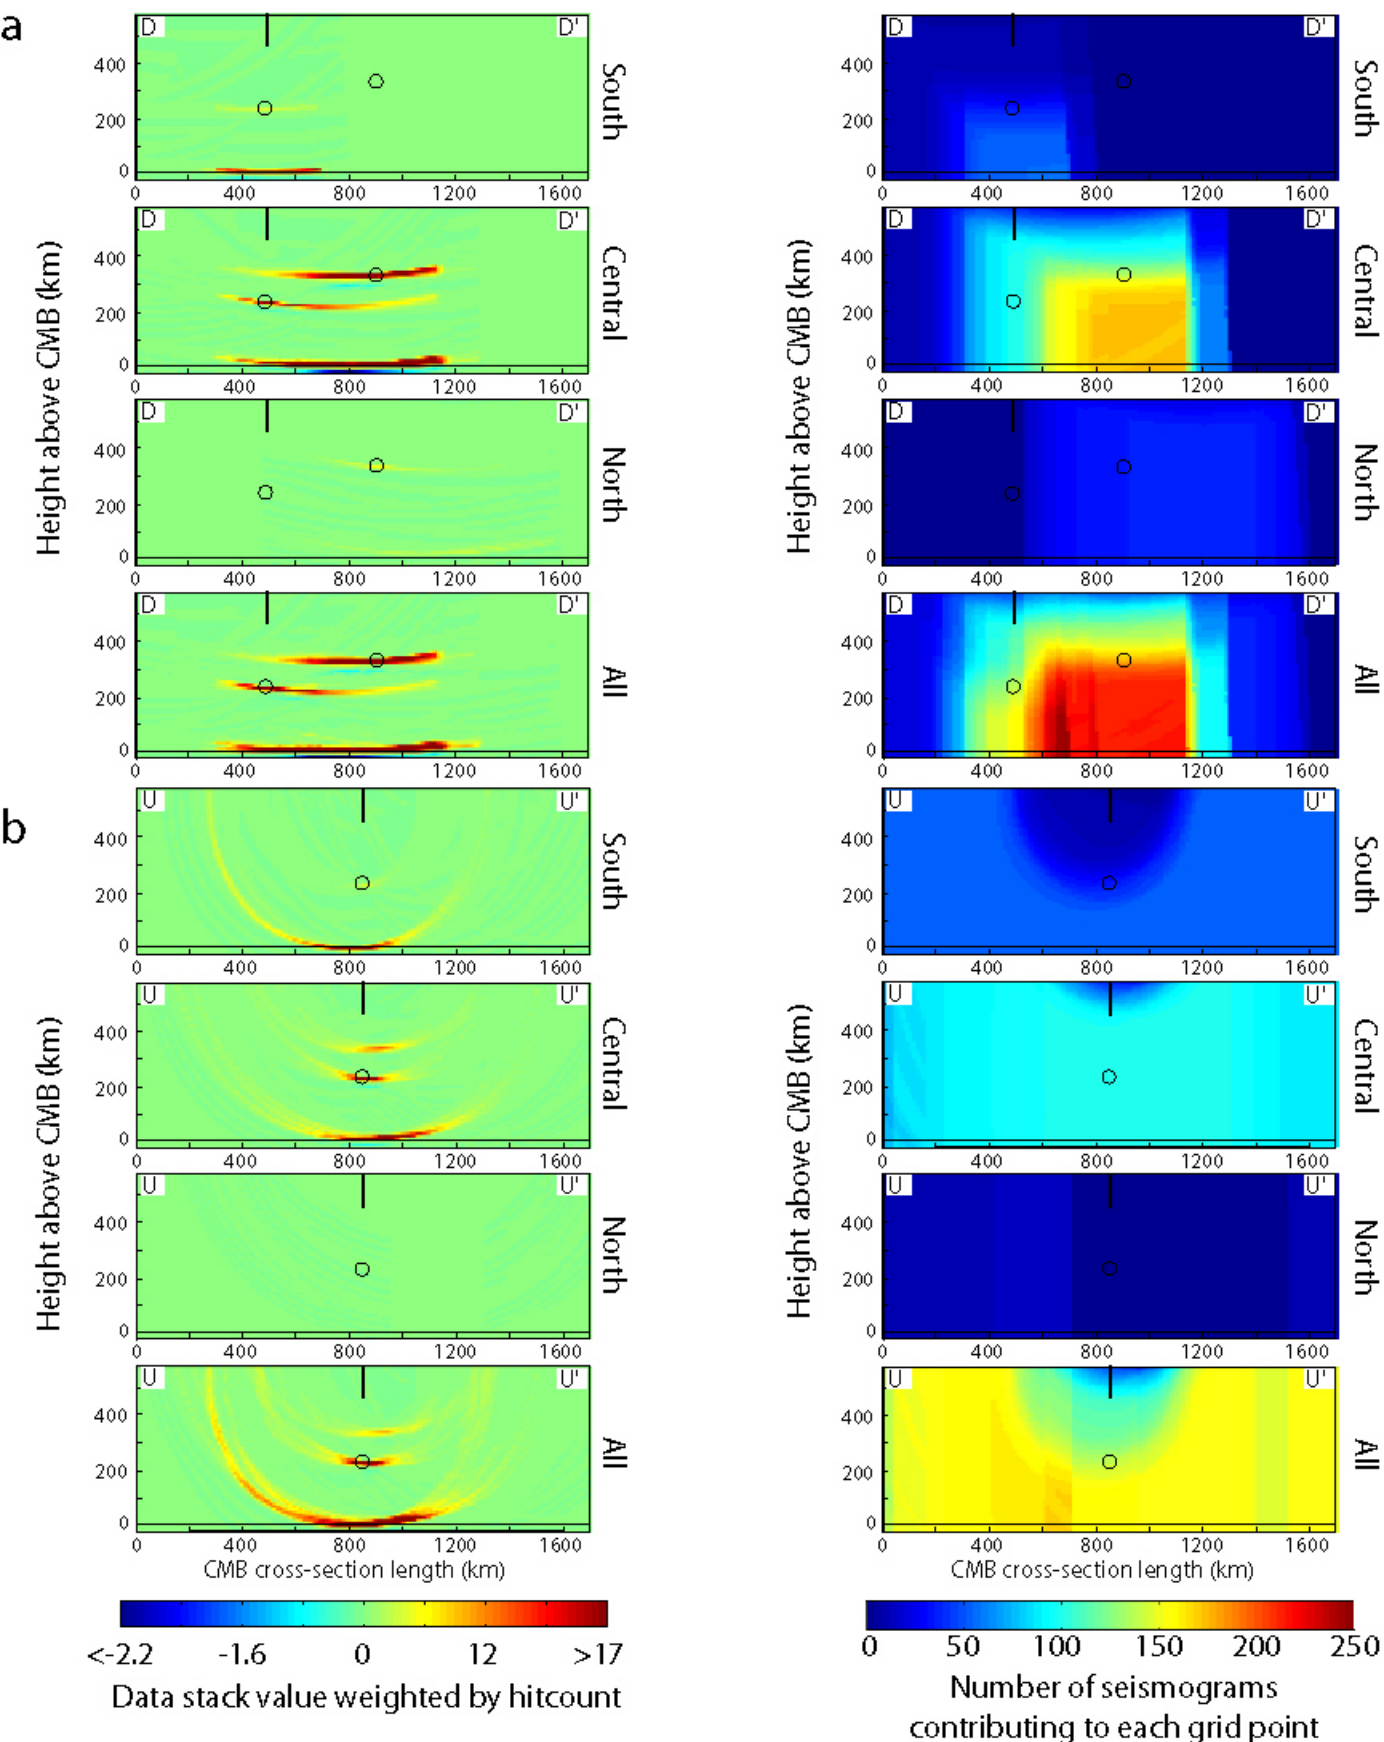

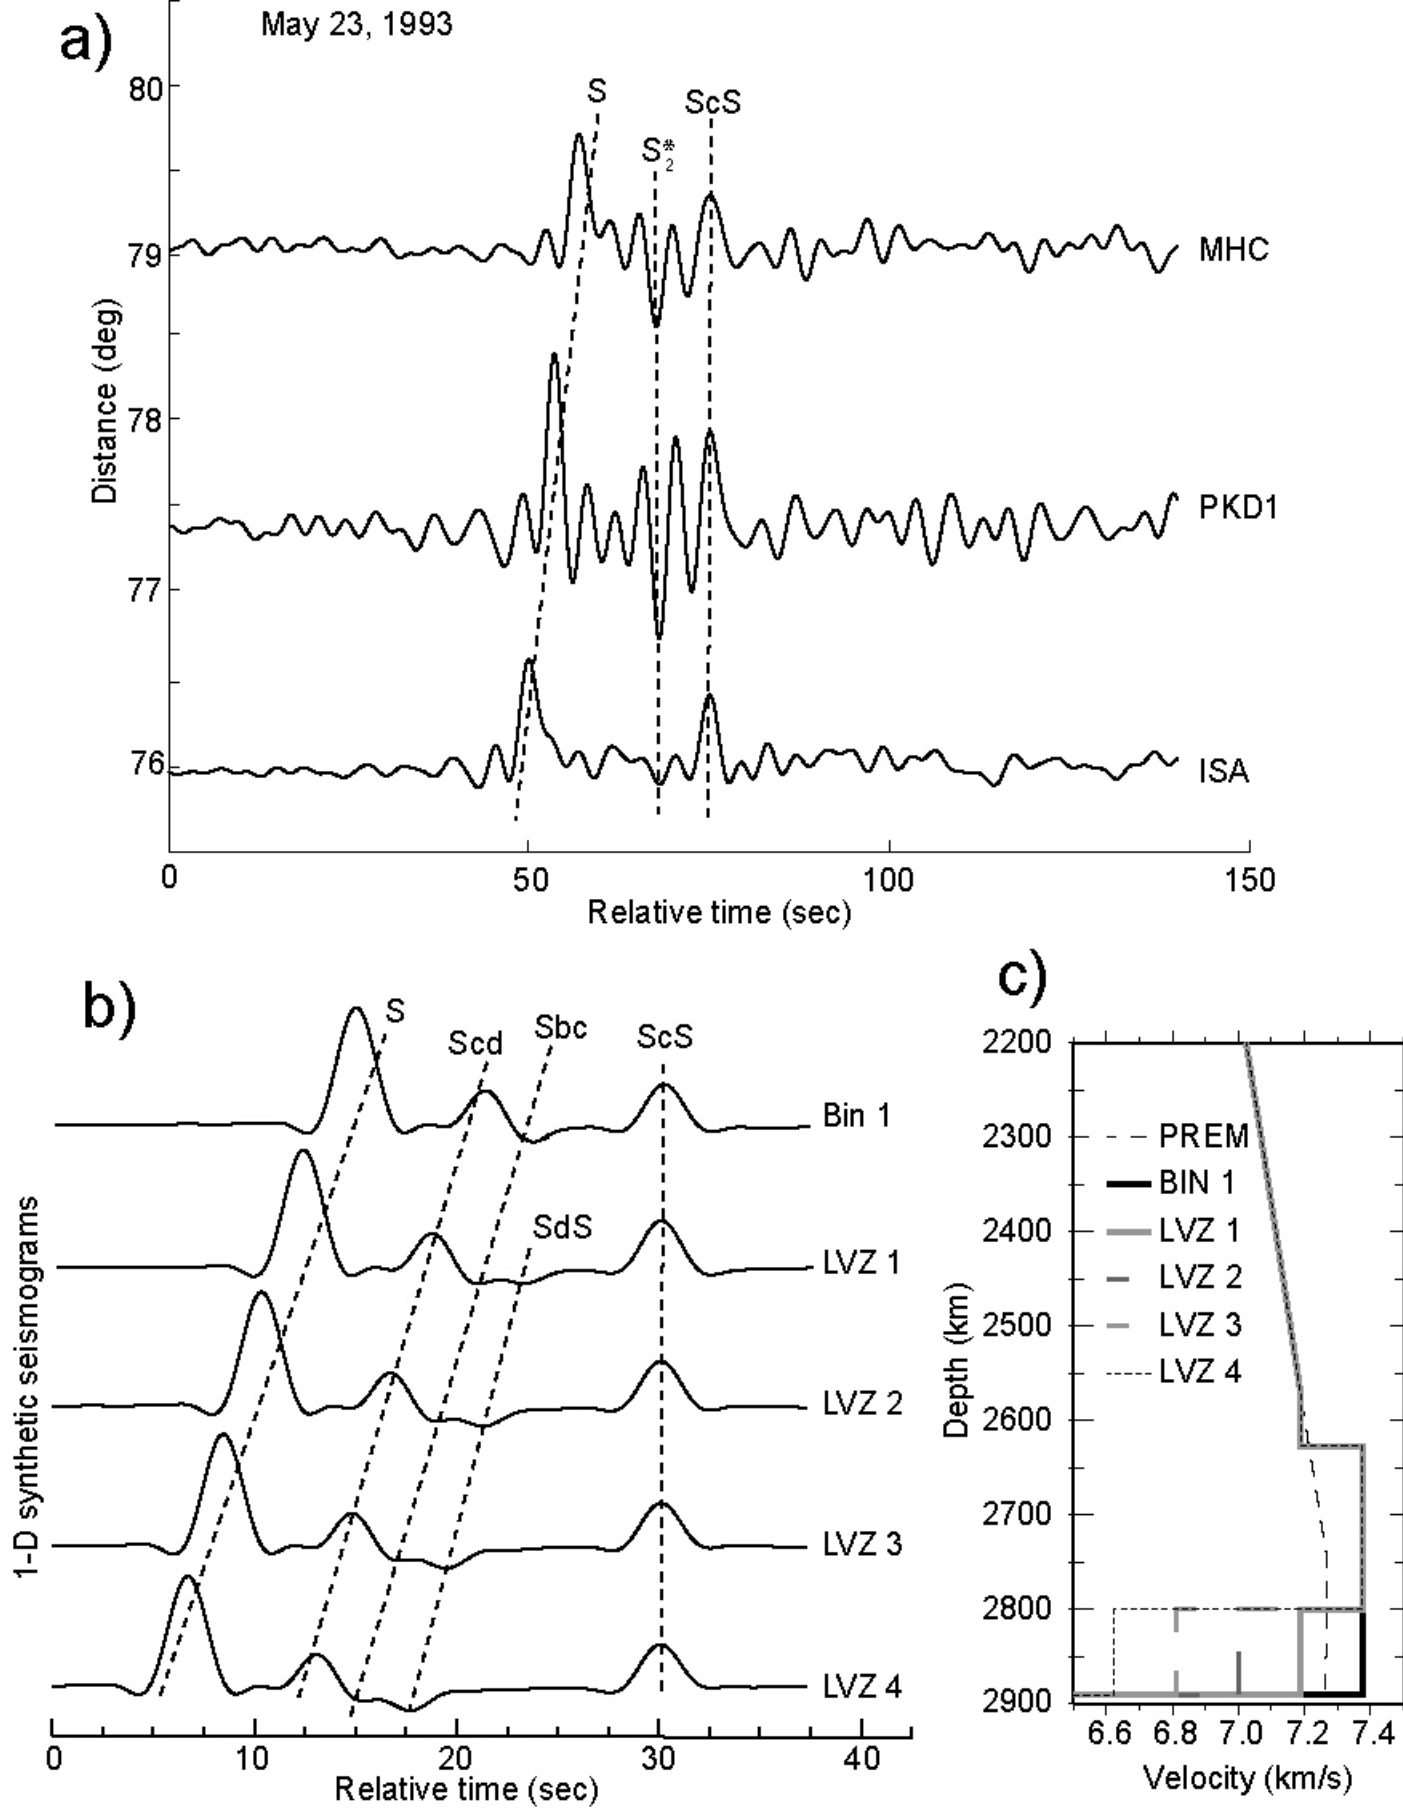

Supplementary Figure 7 [Hutko et al., 2006]

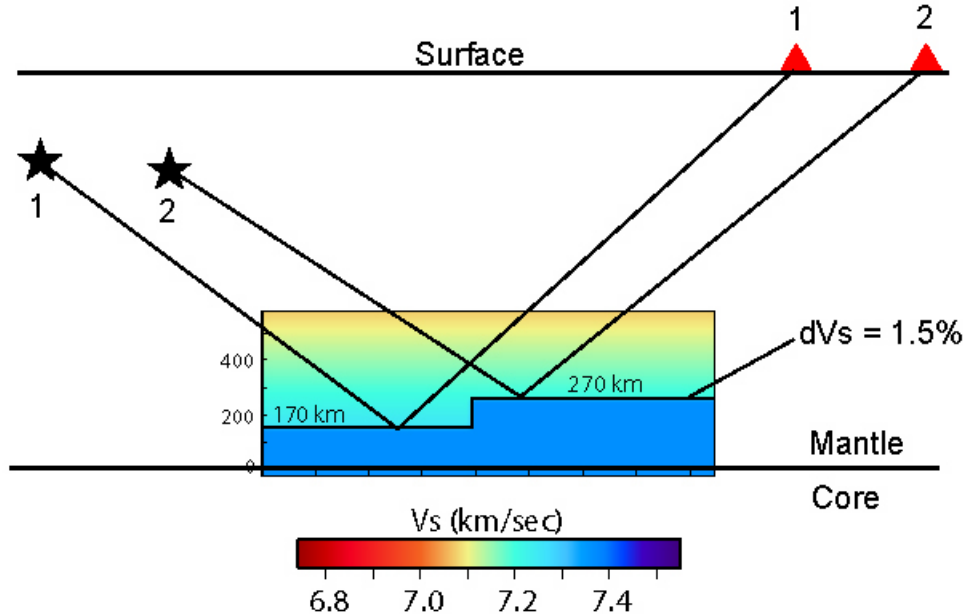

Source-receiver distance = 78 degrees for all 3 synthetic seismograms

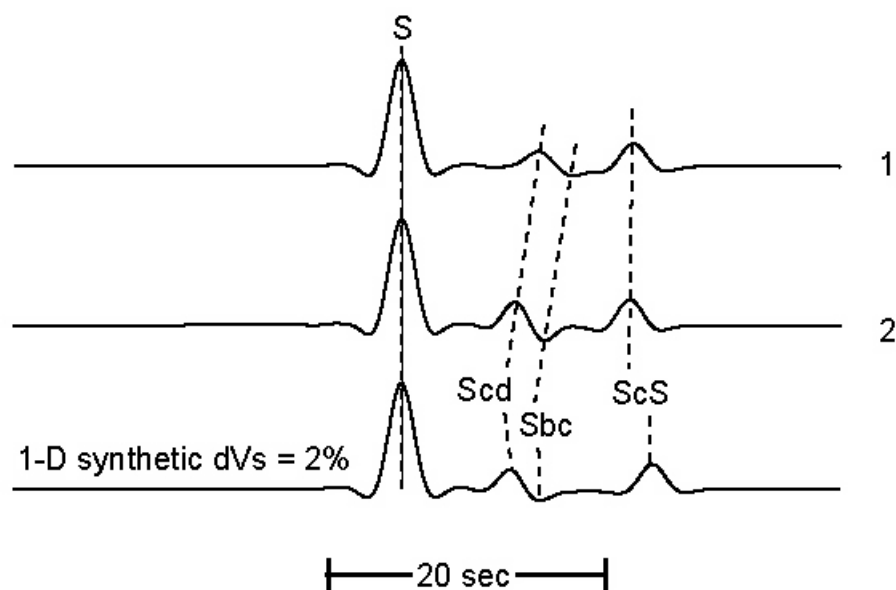

Migration of 3D synthetic seismograms

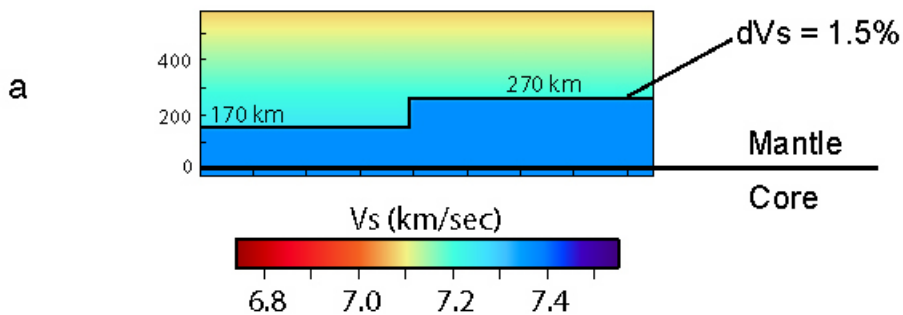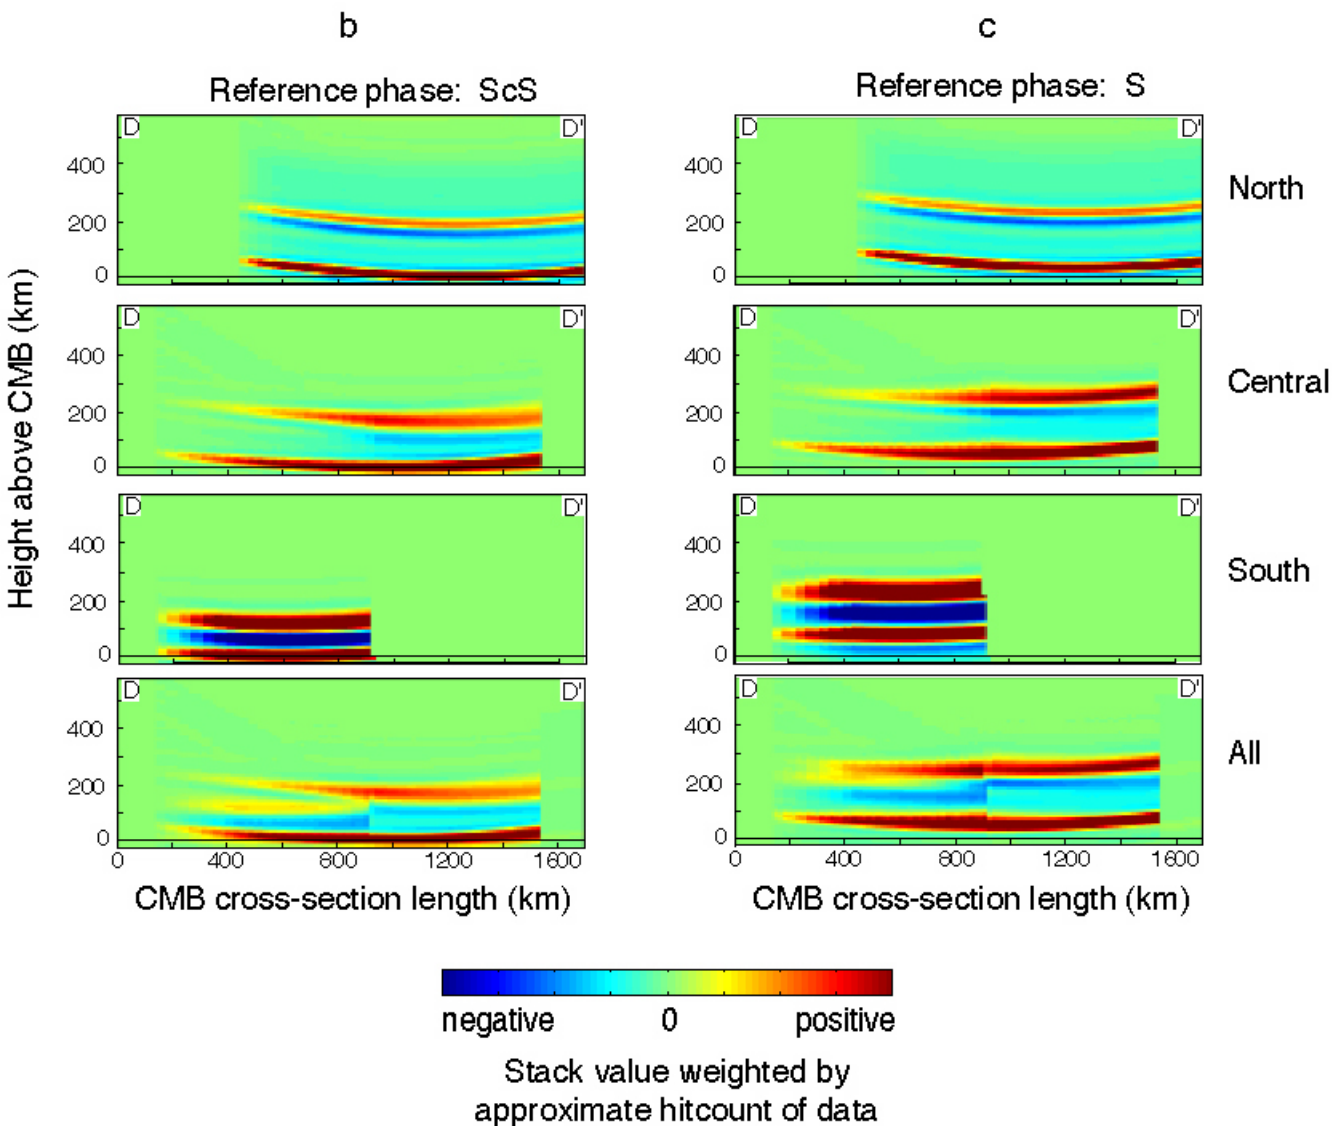

The 5 earthquakes  
in southern cluster  
assumed to be:

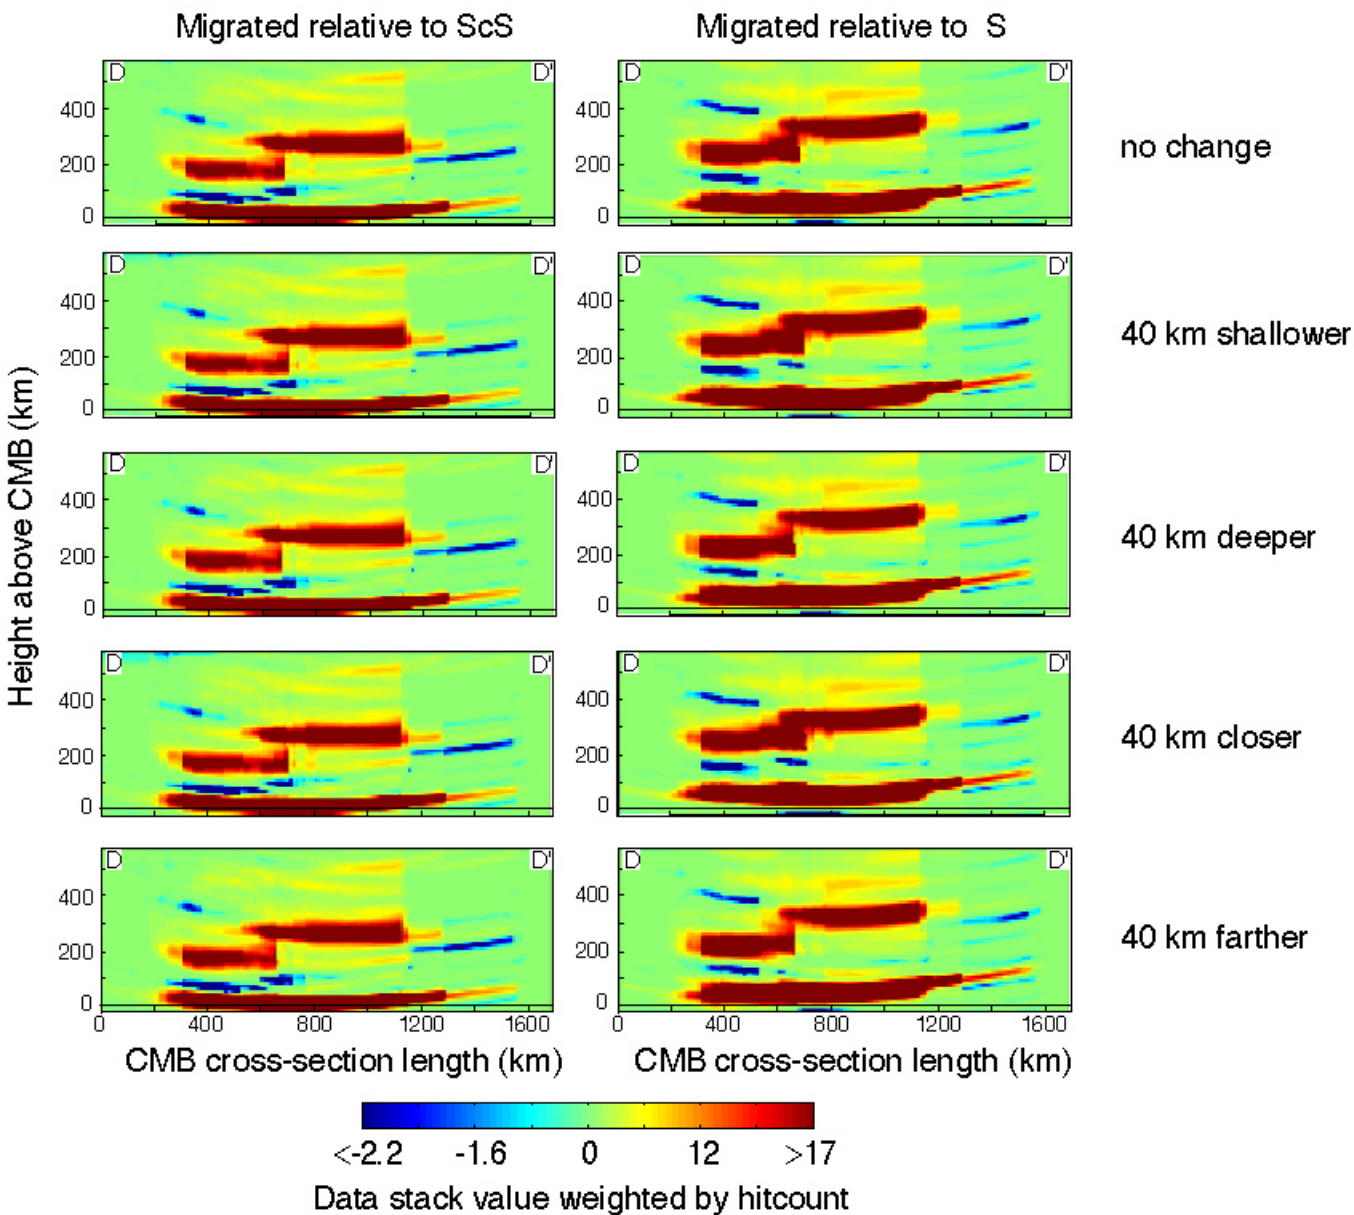

# 1-D double array stacks

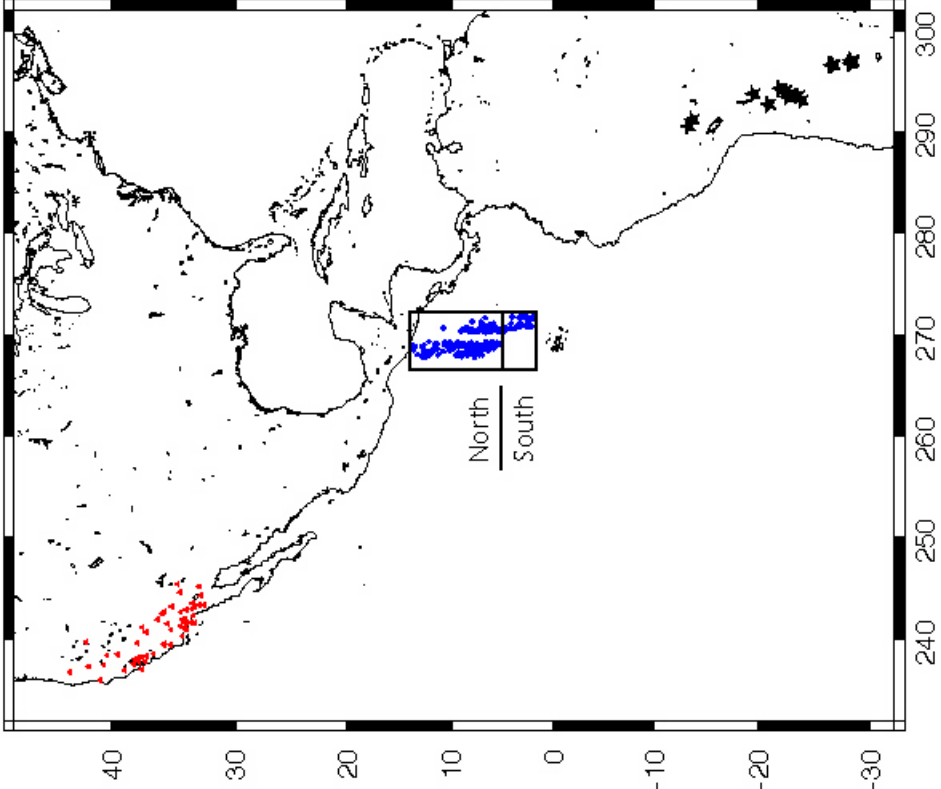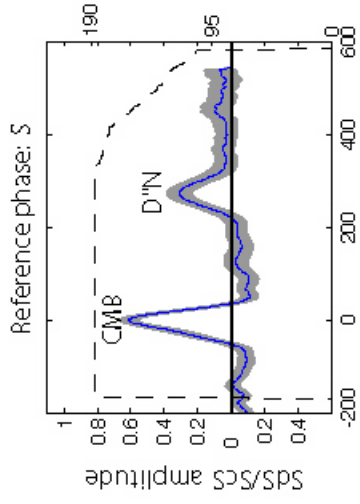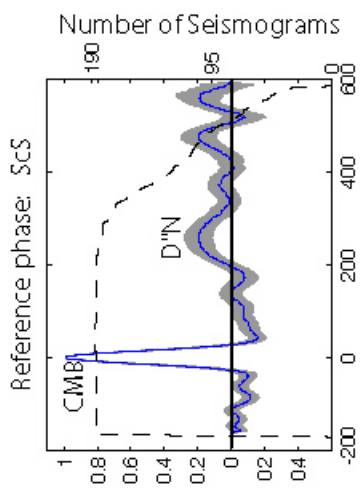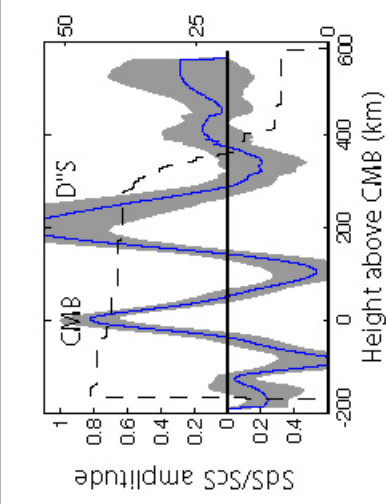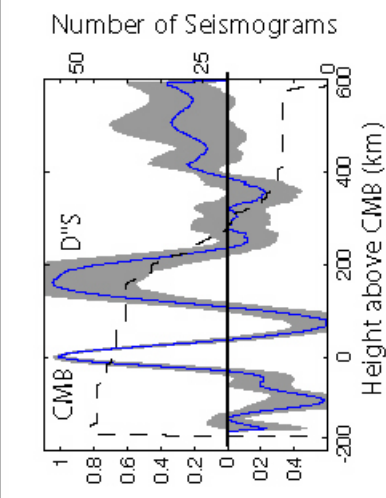

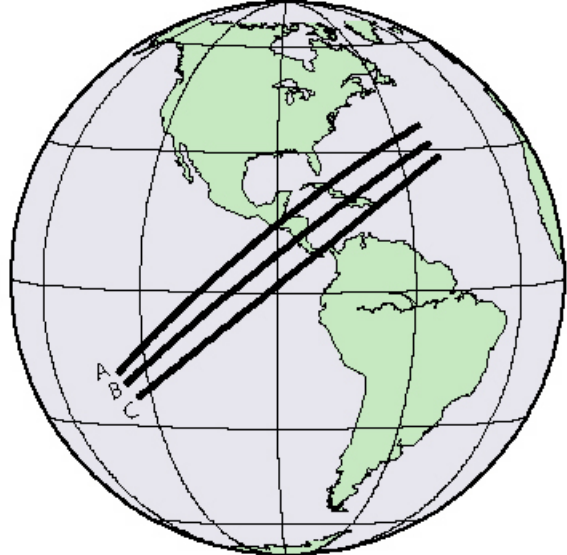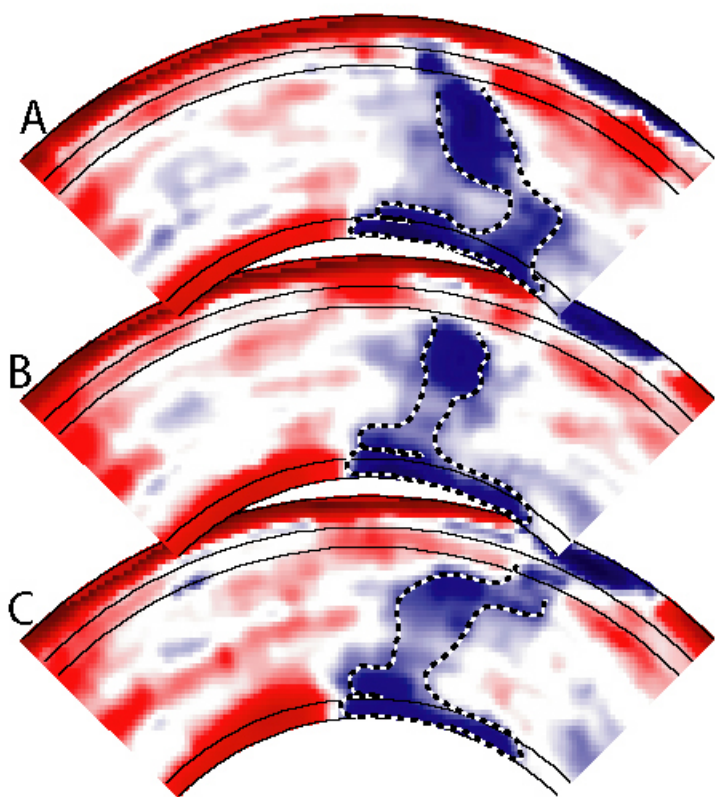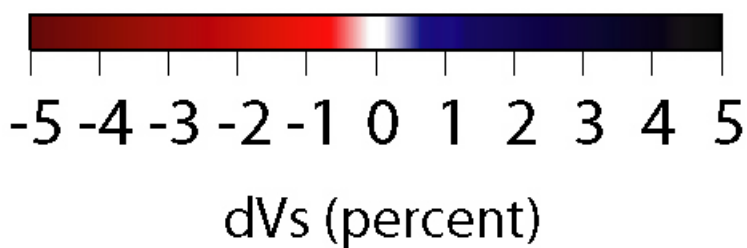

Supplement: 41586_2006_BFnature04757_MOESM1_ESM.pdf [file 41586_2006_BFnature04757_MOESM1_ESM.pdf]
